# Supplementary material for: Mouse Rif1 is a regulatory subunit of protein phosphatase 1 (PP1)
Source: PubMed Central journal article supplement (PMC5437018; doi:10.1038/s41598-017-01910-1), 2017-05-18

## **SUPPLEMENTAL FILES**

### **Mouse Rif1 is a regulatory subunit of protein phosphatase 1 (PP1)**

Rasa Sukackaite, Daniela Cornacchia, Malene Ringkjøbing Jensen, Philippe J. Mas, Martin Blackledge, Elin Enernald, Guangyou Duan, Tania Auchynnika, Maja Köhn, Darren J. Hart and Sara B.C. Buonomo

**SUPPLEMENTAL FIGURE 1.** The majority of Rif1 fails to be solubilised by standard protocols. **(A)** Schematic representation of the position of the putative PP1 docking motifs in mouse Rif1 protein. **(B)** Only a minor fraction of total Rif1 can be solubilised by medium salt (0.4 M NaCl) extraction from ESCs nuclei<sup>46</sup>. **(C, D)** Rif1 from ESCs is completely refractory to solubilisation through nuclease-mediated chromatin digest. **(C)** Ethidium bromide-stained agarose gel showing different degrees of chromatin fragmentation obtained by treatment with different nucleases: micrococcal nuclease (MNase) for the indicated times; DNase I **(D)**; RNase A **(R)**; Benzonase **(B)** for 2 h. **(D)** Protein fraction obtained by the chromatin treated with a combination of DNase I and RNase A. Although no visible DNA is left, Rif1 is not released in the soluble fraction. **(E)** About 50% of Rif1 is released in the soluble fraction upon 3 cycles of snap-freezing in liquid nitrogen and thawing of nuclei isolated from both ESCs and mouse embryonic fibroblasts (MEFs). **(F)** Coomassie blue-stained SDS-PAGE showing the amount of GST-Rif1 fragments bound onto glutathione Sepharose beads. **(G)** Western blot of the samples shown in E, probed with anti-GST antibody. **(H)** Normalised NMR intensity ratio of the spectrum of CRI with PP1 **(I)** and without **(I<sup>0</sup>)** corresponding to the two NMR spectra shown in Fig. 2D.

**SUPPLEMENTAL TABLE 1.** **(A)** List of all proteins interacting with Rif1, showing the single as well as the averaged LFQ intensities. **(B)** Subset of lower-confidence interacting protein: although peptides are present in at least two out of the three Rif1<sup>FH/+</sup> ESC lines, no corresponding peptide is present in the negative controls. In order to calculate the ratio of LFQs, the 0 values have been replaced with 1, driving therefore the ratios to artificially high values. **(C)** List of high-confidence nuclear Rif1 partners, with an enrichment cut-off  $\geq 1.5$  above the negative control.

Supplemental Figure 1

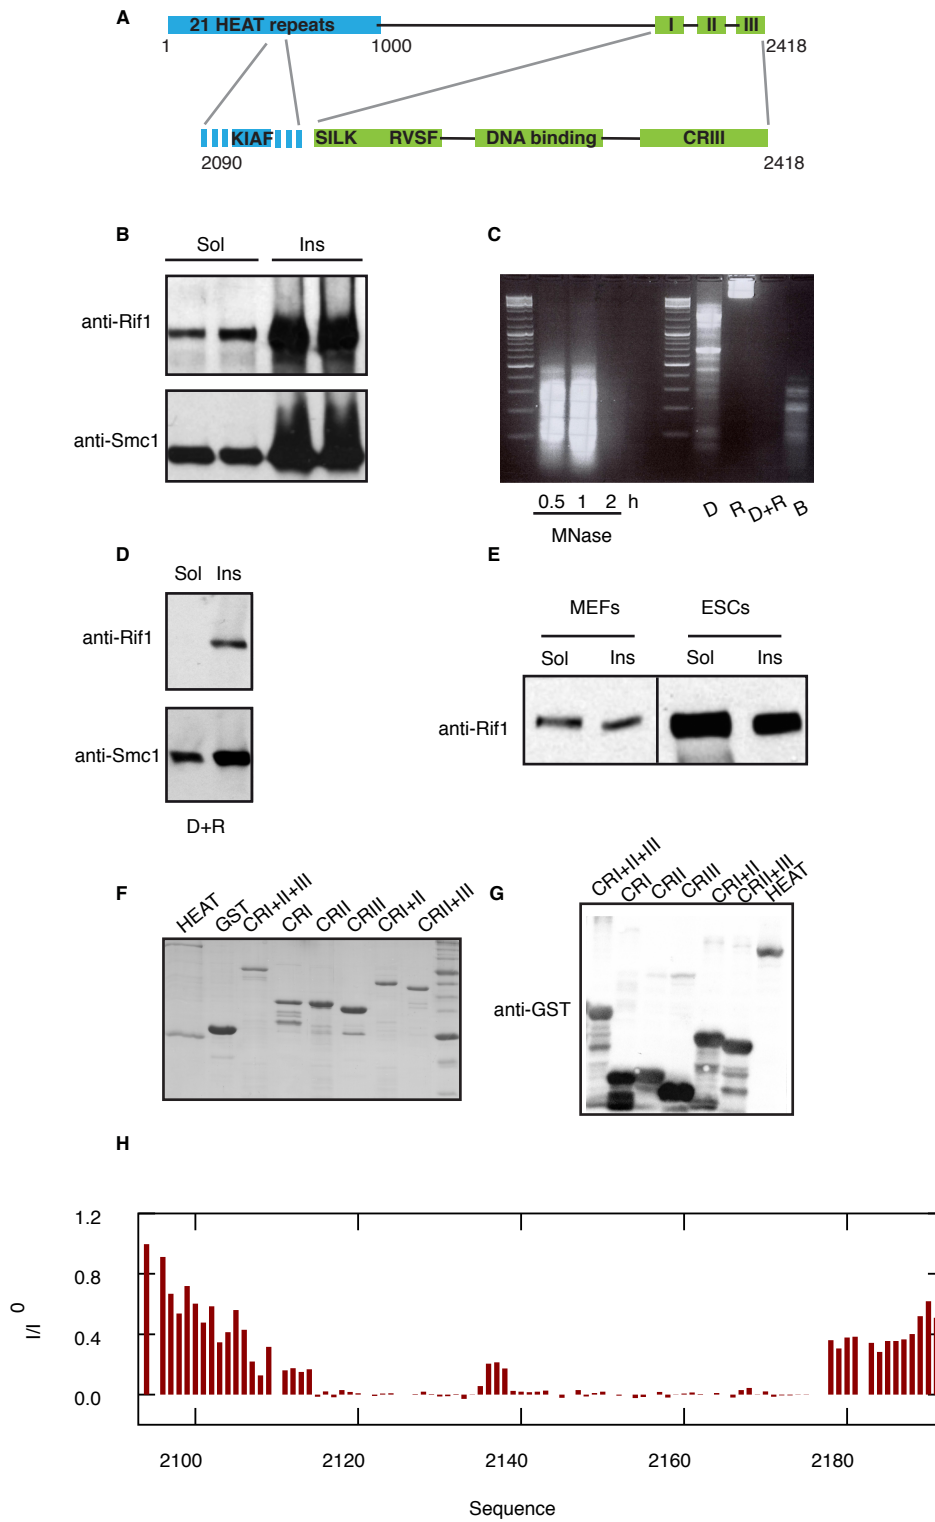

Supplement: 41598_2017_1910_MOESM1_ESM.pdf [file 41598_2017_1910_MOESM1_ESM.pdf]
